# Supplementary material for: Deep learning-based activity recognition and fine motor identification using 2D skeletons of cynomolgus monkeys
Source: PubMed Central journal article supplement — Zool Res. 2023 Sep 18;44(5):967–80. doi: 10.24272/j.issn.2095-8137.2022.449 (PMC10559098; doi:10.24272/j.issn.2095-8137.2022.449), 2023-09-18
Supplement: zr-44-967-S1.pdf [file zr-44-967-S1.pdf]

## Supplementary Materials

### Deep learning-based activity recognition and fine motor identification using 2D skeletons of cynomolgus monkeys

Chuxi Li <sup>1,#</sup>, Zifan Xiao <sup>2,#</sup>, Yerong Li <sup>1</sup>, Zhinan Chen <sup>1</sup>, Xun Ji <sup>3</sup>, Yiqun Liu <sup>4</sup>, Shufei Feng <sup>5</sup>, Zhen Zhang <sup>5</sup>, Kaiming Zhang <sup>6</sup>, Jianfeng Feng <sup>2</sup>, Trevor W. Robbins <sup>2,7</sup>, Shisheng Xiong <sup>1,\*</sup>, Yongchang Chen <sup>5</sup>, Xiao Xiao <sup>2,\*</sup>

1. *School of Information Science and Technology Micro Nano System Center, Fudan University, Shanghai 200433, China*
2. *Department of Anesthesiology, Huashan Hospital; Key Laboratory of Computational Neuroscience and Brain-Inspired Intelligence, Ministry of Education; Behavioral and Cognitive Neuroscience Center, Institute of Science and Technology for Brain-Inspired Intelligence, MOE Frontiers Center for Brain Science, Fudan University, Shanghai 200433, China*
3. *Kuang Yaming Honors School, Nanjing University, Nanjing, Jiangsu 210023, China*
4. *Shanghai Key Laboratory of Intelligent Information Processing, School of Computer Science, Fudan University, Shanghai 200433, China*
5. *State Key Laboratory of Primate Biomedical Research; Institute of Primate Translational Medicine, Kunming University of Science and Technology, Kunming, Yunnan 650500, China*
6. *New Vision World LLC., Aliso Viejo, California 92656, USA*
7. *Behavioural and Clinical Neuroscience Institute, University of Cambridge, Cambridge, CB2 1TN, UK*

<sup>#</sup>Authors contributed equally to this work

<sup>\*</sup>Corresponding authors, E-mail: sxiong@fudan.edu.cn; xiaoxiao@fudan.edu.cn

**A**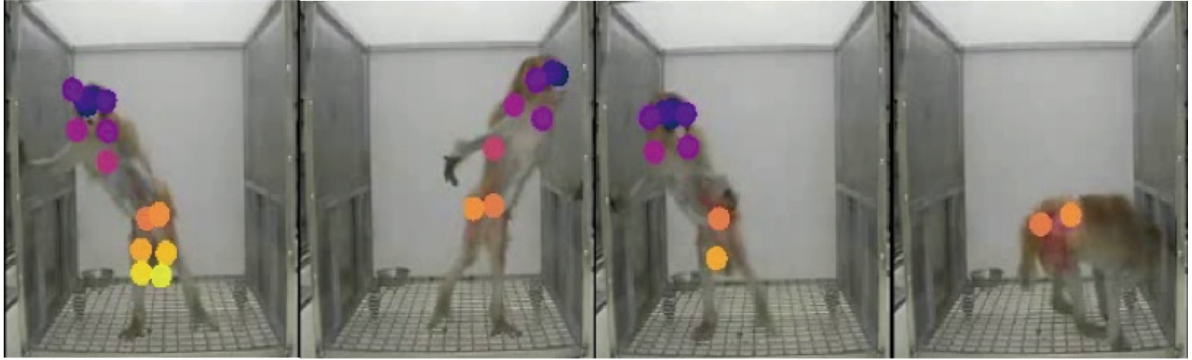**B**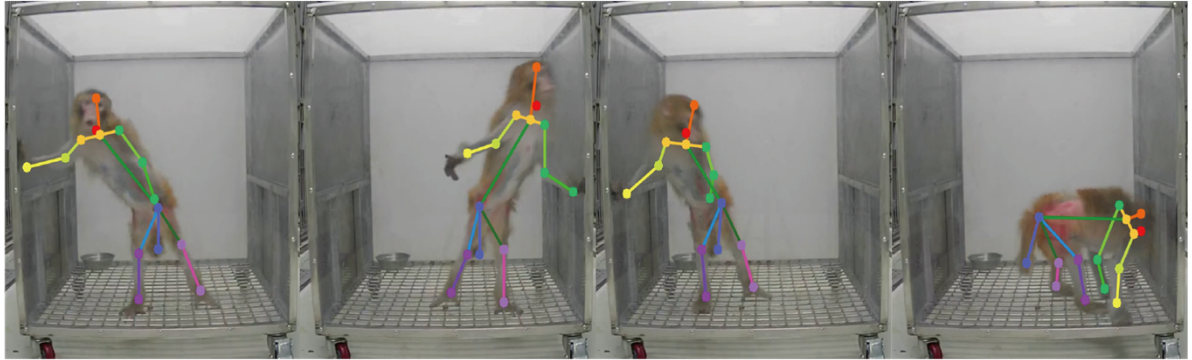**C**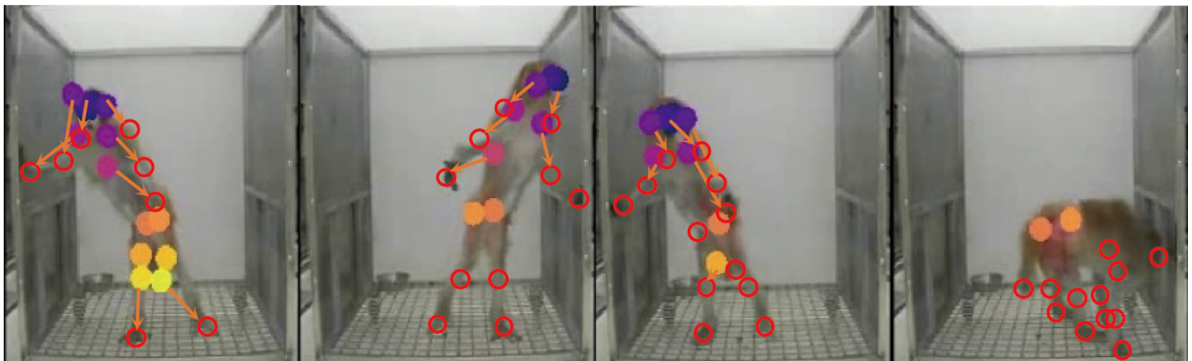**Supplementary Figure S1 Comparison between DeepLabCut and MonKit**

A: Keypoint recognition from DeepLabCut. B: Keypoint recognition from MonKit in this study. C: Keypoint recognition of DeepLabCut with marks in error points. Red circles with yellow arrows point to correct positions. Solid circles are joints of monkey identified by DeepLabCut, with most misidentified.

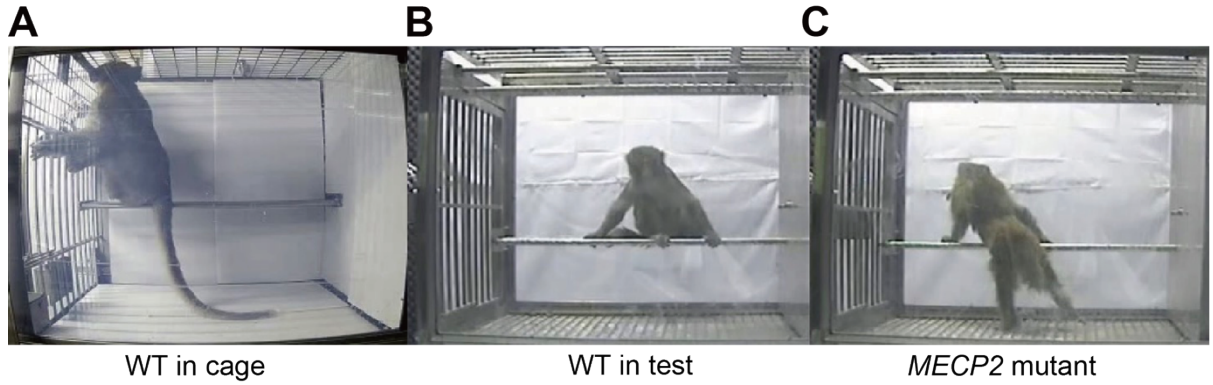

**Supplementary Figure S2 Home and test cage environments**

A: WT monkey in home cage. B: WT monkey in test cage. C: *MECP2* mutant monkey in test cage.

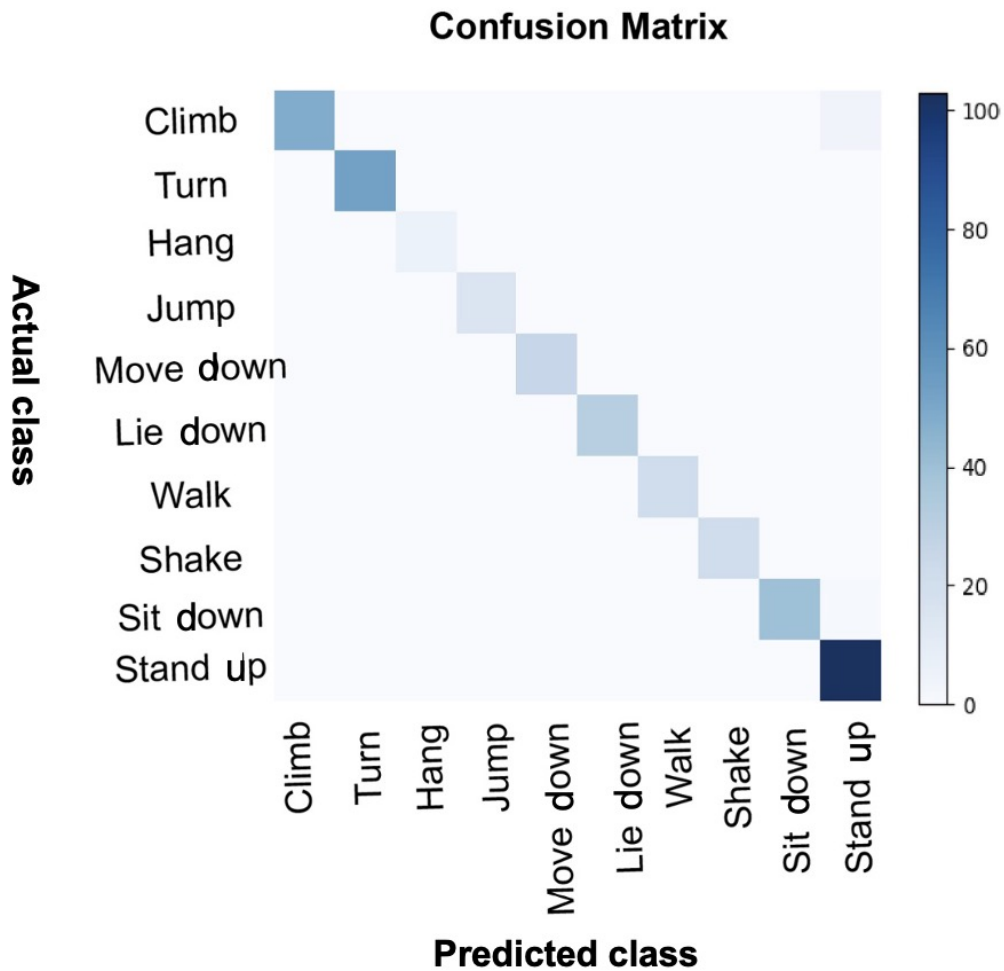

**Supplementary Figure S3 Confusion matrix results of action recognition**

Horizontal sum is true result, vertical sum is predicted result.

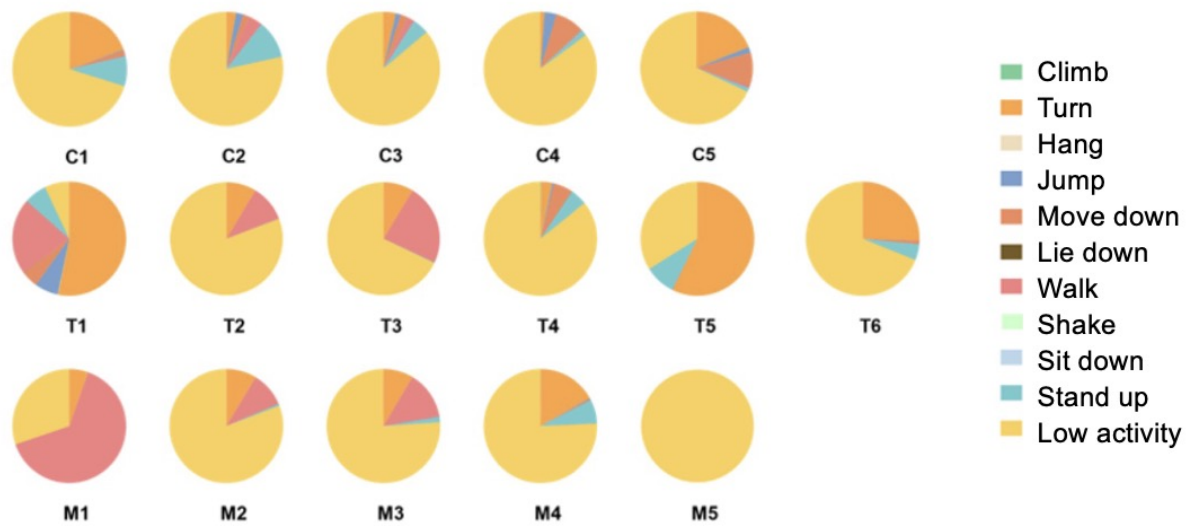

**Supplementary Figure S4 Percentage of time spent by individual monkeys in different action categories**

Time spent in Climb, Hang, Turn, Walk, Jump, Move Down, Lie Down, Stand Up, and Low Activity categories. C1–C5: Monkeys in home cages; T1–T6: Monkeys in test cages; M1–M5: *MECP2* mutant monkeys in test cages.



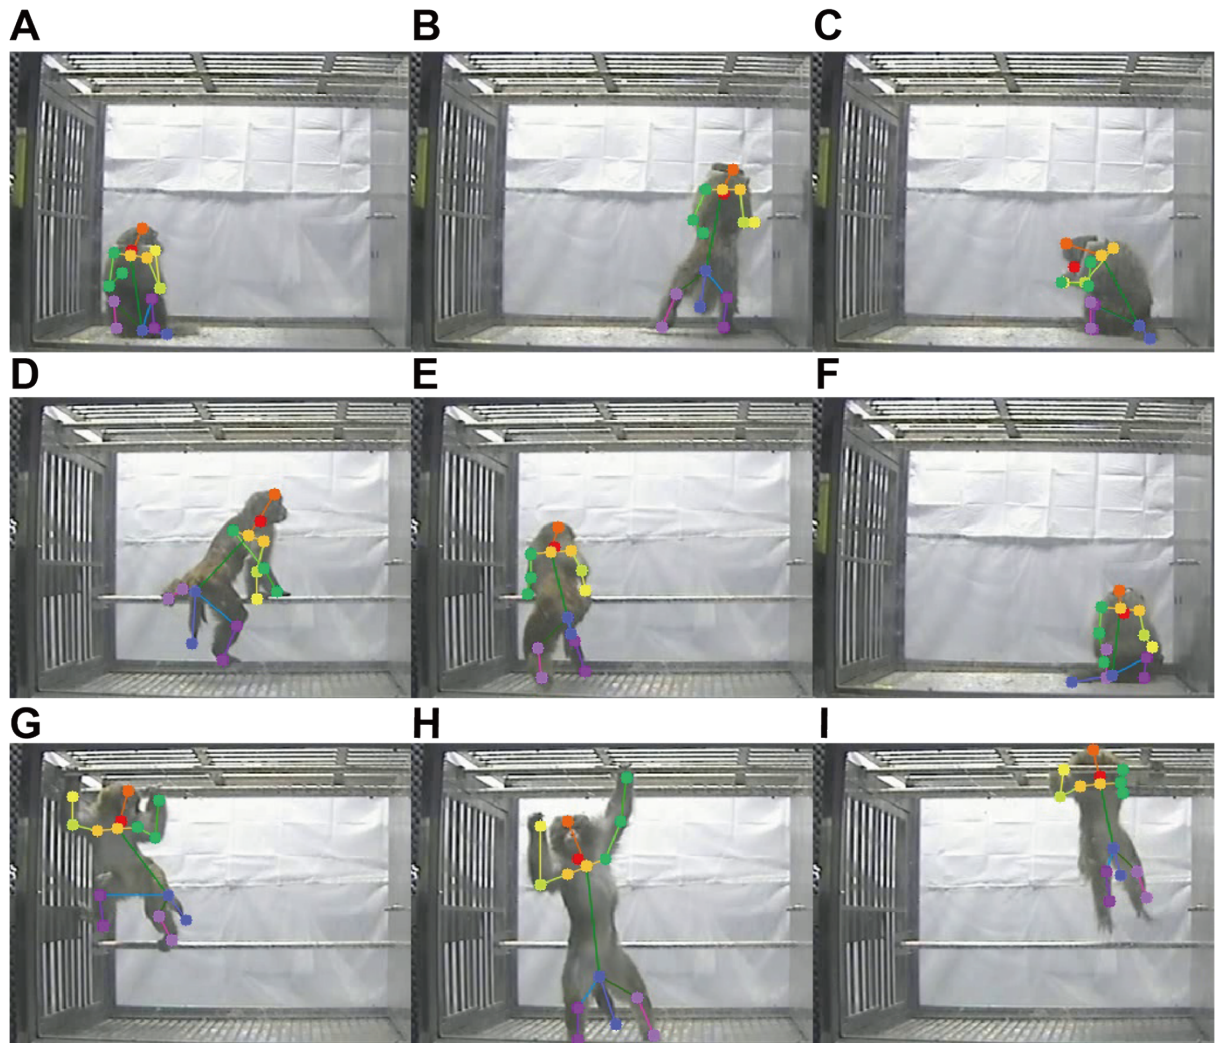

**Supplementary Figure S5 Keypoint recognition by MonKit during back and side positions to camera**

A-F: Keypoint recognition for back or side of monkey. G-I: Keypoint recognition for front of monkey

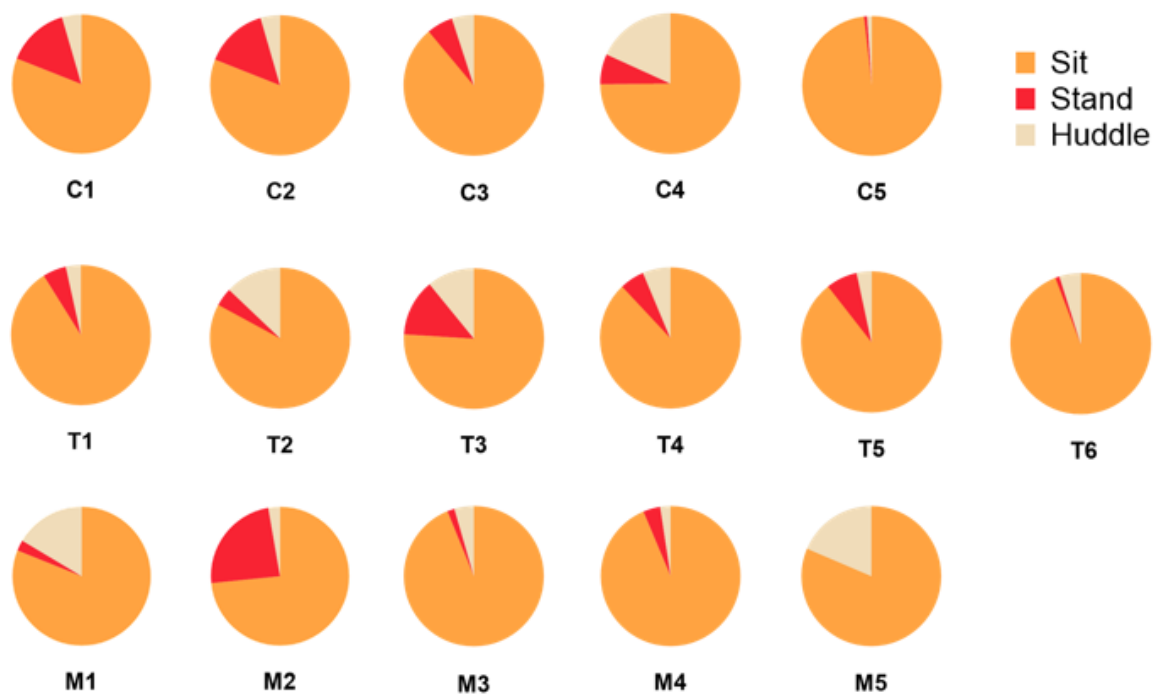

**Supplementary Figure S6 Percentage of time spent by individual monkeys in posture categories**

Time spent in huddle, sit, and stand categories. C1–C5: Monkeys in home cages; T1–T6: Monkeys in test cages; M1–M5: *MECP2* mutant monkeys in test cages.

**Supplementary Table S1 Accuracy, precision, and recall of stereotyped, head-down, sit, stand, and huddle behaviors**

|                              | <b>Accuracy</b> | <b>Precision</b> | <b>Recall</b> |
|------------------------------|-----------------|------------------|---------------|
| <b>Stereotyped Behaviour</b> | 96.19%          | 85.08%           | 90.05%        |
| <b>Head Down</b>             | 98.72%          | 53.07%           | 85.41%        |
| <b>Sit</b>                   | 95.71%          | 99.05%           | 97.31%        |
| <b>Stand</b>                 |                 | 100%             | 100%          |
| <b>Huddle</b>                |                 | 66.09%           | 95.61%        |
